# Supplementary material for: Removal of nitrogenous heterocycles by a CoMoS3/NH2-MIL-53(Fe)-catalyzed photo-Fenton-like process: effect, mechanism and toxicity evaluation
Source: Royal Society of Chemistry journal article supplement (doi:10.1039/d2qm00073c), 2022-01-01
Supplement: d2qm00073c1.pdf [file d2qm00073c1.pdf]

## Supplementary information for

### Removal of nitrogenous heterocycles by CoMoS<sub>3</sub>/NH<sub>2</sub>-MIL-53(Fe)-catalyzed photo Fenton-like process: Effect, mechanism and toxicity evaluation

Na Ma<sup>a</sup>, Ping Xue<sup>\*a</sup>, Zhengwei Jin<sup>b</sup>, Shuai Yang<sup>b</sup>, Lan Ma<sup>a</sup>, Rui Li<sup>a</sup>

a. State Key Laboratory of High-efficiency Coal Utilization and Green Chemical Engineering, College of Chemistry & Chemical Engineering, Ningxia University, Yinchuan 750021, China

b. Ningxia Coal Industry Co., Ltd., CHN ENERGY Investment Group, Yinchuan 750411, China

\* Corresponding author: Xue ping, State Key Laboratory of High-efficiency Coal Utilization and Green Chemical Engineering, College of Chemistry & Chemical Engineering, Ningxia University, Yinchuan 750021, China

Email: ping@nxu.edu.cn

#### Indole intermediates:

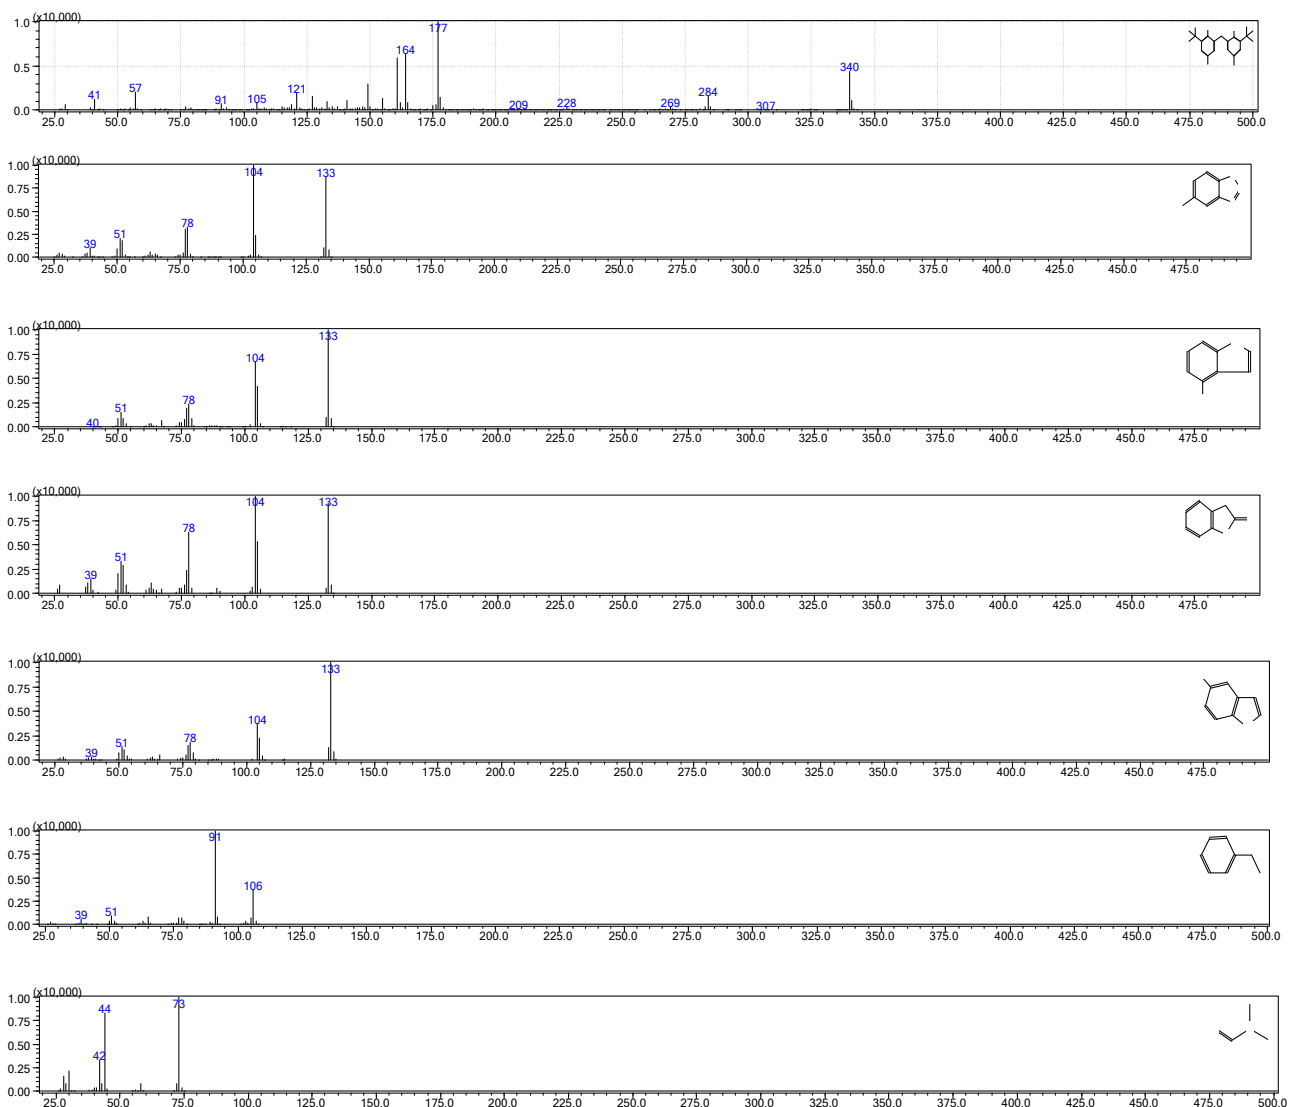

\* Corresponding author: Xue ping

Email: ping@nxu.edu.cn

## Quinoline intermediates:

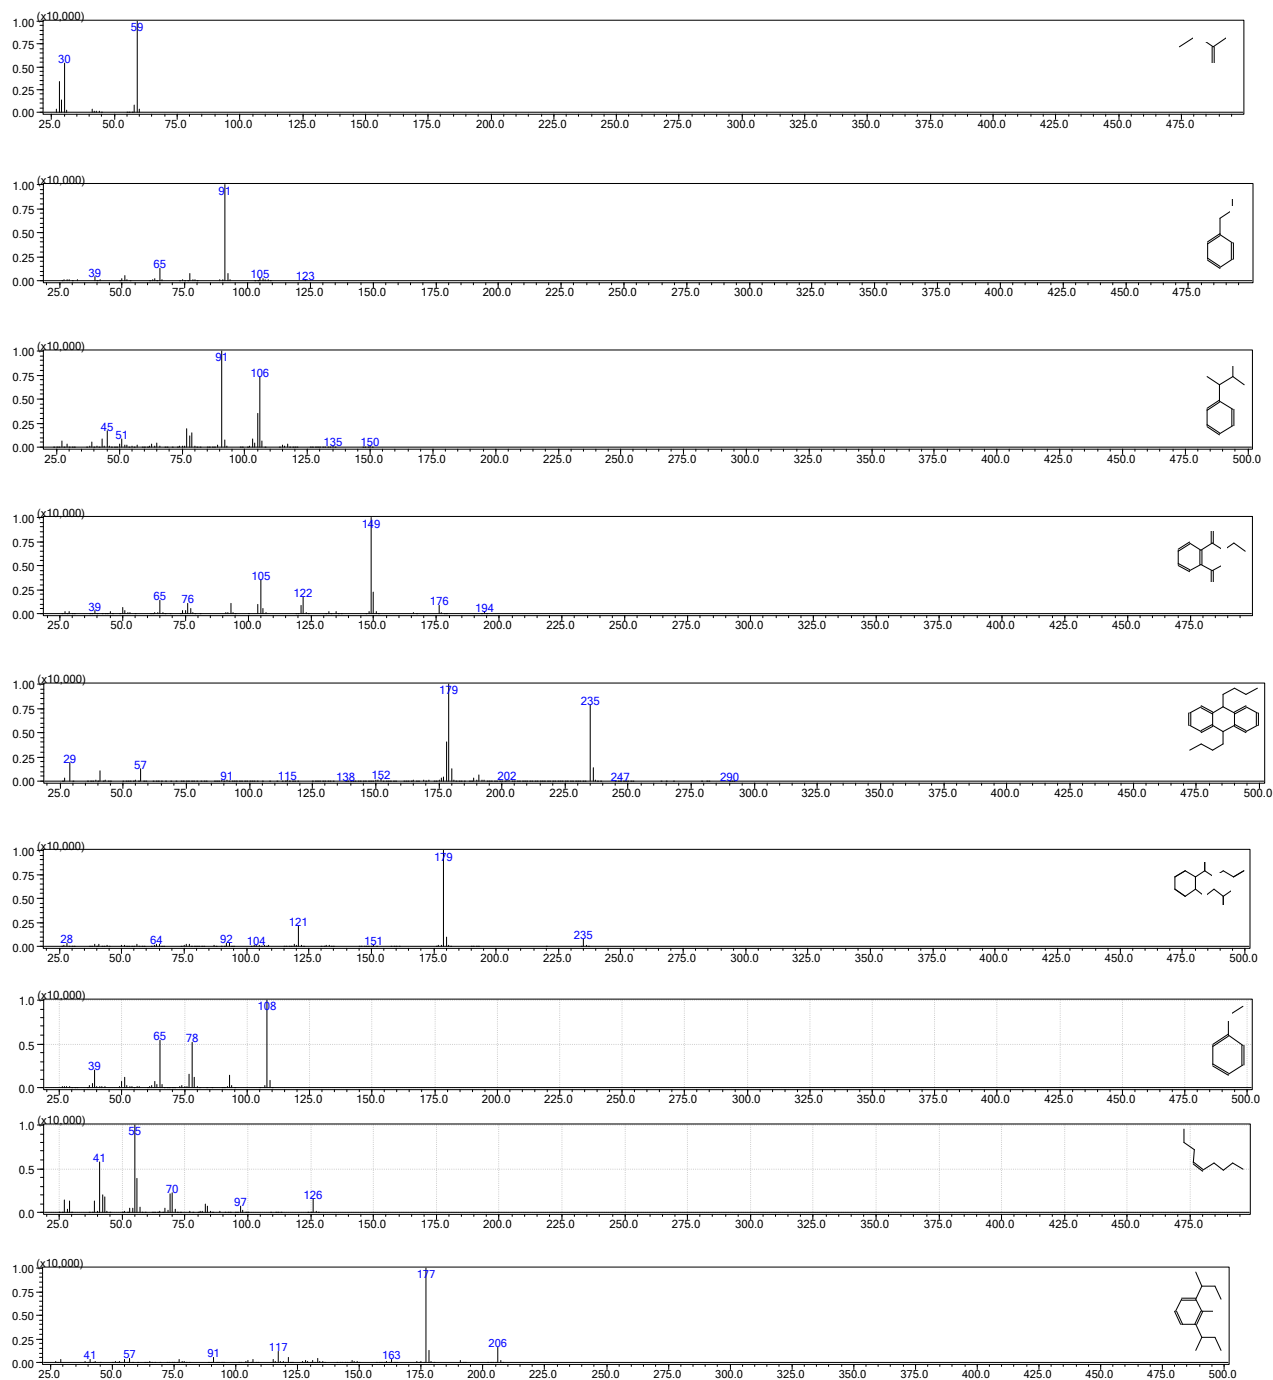

Fig. S1. LC-MS analysis of the intermediates of indole and quinoline
